# Supplementary material for: Assessing the Efficacy of Coagulation (Al3+) and Chlorination in Water Treatment Plant Processes: Inactivating Chironomid Larvae for Improved Tap Water Quality
Source: MDPI journal article supplement (doi:10.3390/app13095715), 2023-05-05
Supplement: s1 [file s1]

Supplementary Materials

# Assessing The Efficacy of Coagulation ( $\text{Al}^{3+}$ ) and Chlorination in Water Treatment Plant Processes: Inactivating Chironomid Larvae for Improved Tap Water Quality

Haerul Hidayaturrahman <sup>1,2</sup>, Hyuk Jun Kwon <sup>1</sup>, Yumeng Bao <sup>1</sup>, Shaik Gouse Peera <sup>1,\*</sup> and Tae Gwan Lee <sup>1,\*</sup>

<sup>1</sup> Department of Environmental Science, Keimyung University, Daegu 42601, Republic of Korea; haerul.hidayat@gmail.com (H.H.); kanata86@nate.com (H.J.K.); yumengbao994@gmail.com (Y.B.)

<sup>2</sup> National Research and Innovation Agency, Central Jakarta 10340, Indonesia

\* Correspondence: gouse@kmu.ac.kr (S.G.P.); wateree@kmu.ac.kr (T.G.L.)

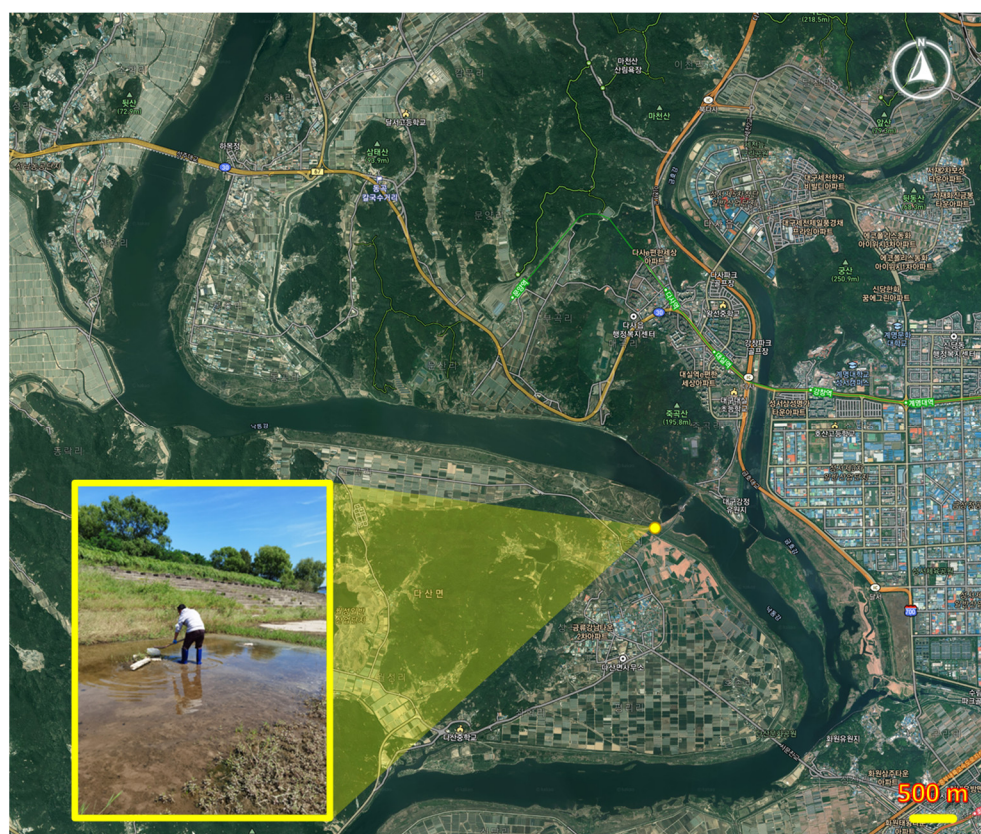

**Figure S1.** The collection site for chironomid larvae.

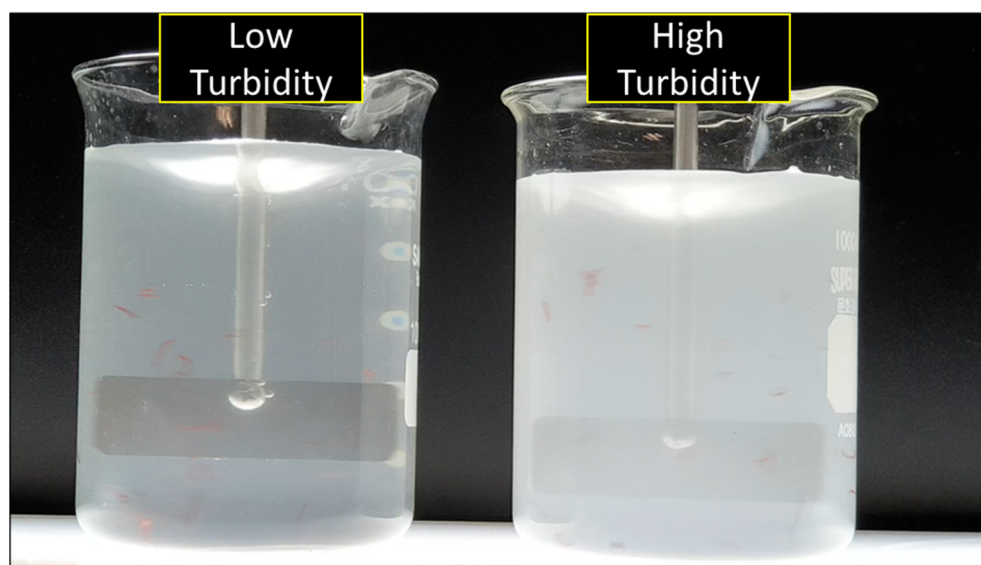

**Figure S2.** Inactivate chironomid larvae through coagulation process.

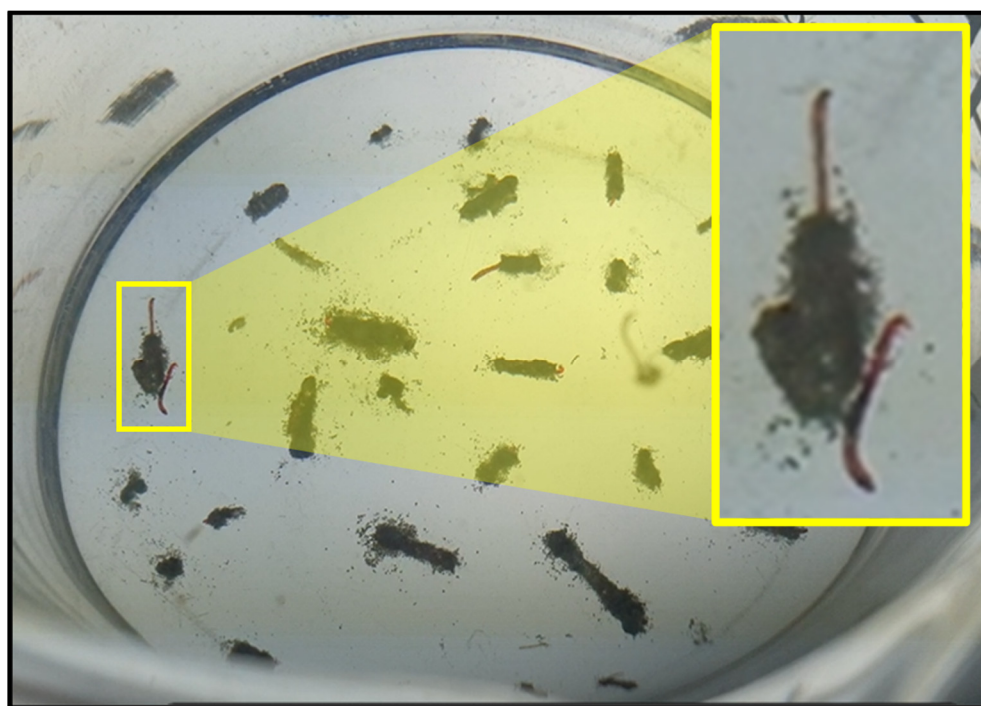

**Figure S3.** The larvae died after being exposed to the coagulant for 5 days.

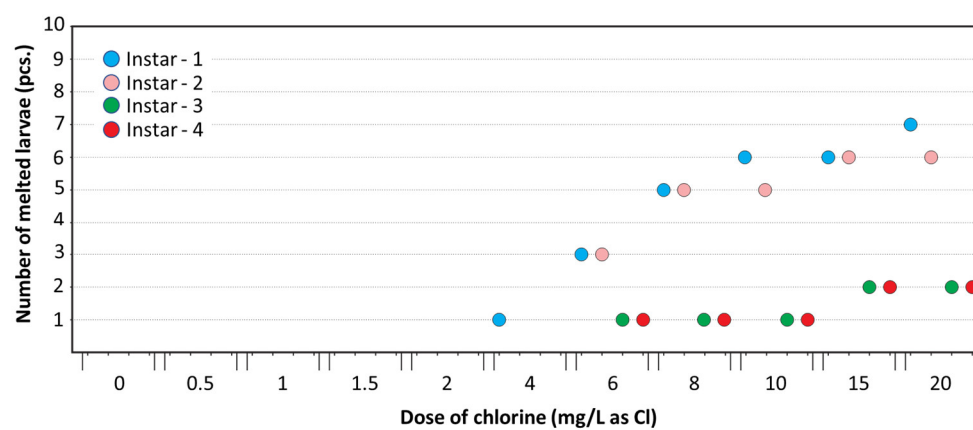

Figure S4. Total of melted larva after 5-day observation.

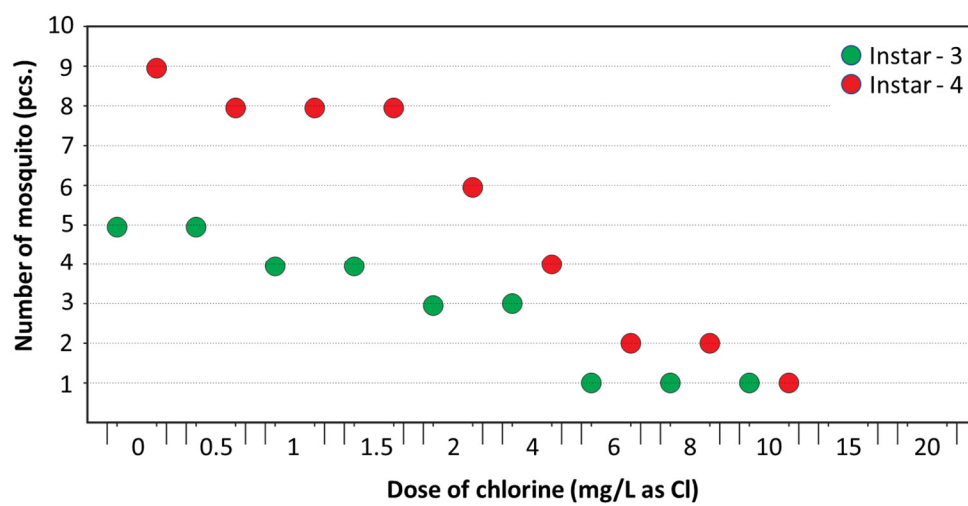

Figure S5. The total number of larvae that became adults after five days.
