# Supplementary material for: Assessing the Efficacy of Coagulation (Al3+) and Chlorination in Water Treatment Plant Processes: Inactivating Chironomid Larvae for Improved Tap Water Quality
Source: MDPI journal article supplement (doi:10.3390/app13095715), 2023-05-05
Supplement: s1 [file s1]

Archive with 1 entries (1 files):
- applsci-2357565-supplementary.pdf
